# Supplementary material for: Trichoderma harzianum Strain T22 Modulates Direct Defense of Tomato Plants in Response to Nezara viridula Feeding Activity
Source: PubMed Central journal article supplement (PMC8116274; doi:10.1007/s10886-021-01260-3), 2021-03-13
Supplement: 10886_2021_1260_MOESM1_ESM.pdf [file 10886_2021_1260_MOESM1_ESM.pdf]

**Supplementary Table S1. Specific primers for quantitative PCR of plant-defense related genes**

| Oligoname | Sequence               | Name/Gene symbol                 | Primer from         |
|-----------|------------------------|----------------------------------|---------------------|
| LoxD Fw   | TTCATGGCCGTGGTTGACA    | lipoxigenase D (LOX D)           | Coppola et al 2015  |
| LoxD Rv   | AACAATCTCTGCATCTCCGG   |                                  |                     |
| PIN II Fw | CCAAAAAGGCCAAATGCTTG   | Proteinase inhibitor II (PIN II) | Coppola et al 2015  |
| PIN II Rv | TGTGCAACACGTGGTACATCC  |                                  |                     |
| PR1 Fw    | ATGCAACACTCTGGTGGACCTT | PR1                              | Coppola et al 2015  |
| PR1 Rv    | CCATTGCTTCTCATCAACCCA  |                                  |                     |
| Actin-fw  | CACCACTGCTGAACGGGAA    | Actin                            | De Palma et al 2016 |
| Actin-rev | GGAGCTGCTCCTGGCAGTTT   |                                  |                     |
